# Supplementary material for: Carbon and nitrogen metabolism under nitrogen variation affects flavonoid accumulation in the leaves of Coreopsis tinctoria
Source: PeerJ. 2021 Sep 10;9:e12152. doi: 10.7717/peerj.12152 (PMC8436962; doi:10.7717/peerj.12152)
Supplement: Supplemental Information 1 [file peerj-09-12152-s001.xlsx]

## Sheet: Total soluble protein content
															Total soluble protein content
				Total soluble protein content										0	20	40	60	80	100
		N1	error	N2	N3	N3	error	N4	error	N5	error			0	0.222	0.391	0.539	0.678	0.817
	Root	1.17	0.12	1.21	0.24	1.26	0.12	1.34	0.13	1.65	0.15
	Stalk	2.54	0.34	2.65	0.25	2.74	0.38	2.85	0.41	2.97	0.34
	Leaf	9.4	0.87	8.92	0.96	9.72	0.93	10.31	0.75	11.42	1.23

## Sheet: Amino acid content
						Amino acid content (μg/g FW)									x	0.026	0.139	0.283	0.424	0.84	1.821
															x	0.027	0.144	0.29	0.415	0.856	1.791
				N1	error	N2	N3	N3	error	N4	error	N5	error		x average	0.0265	0.1415	0.2865	0.4195	0.848	1.806
			Root	359.34	38.45	373.76	30.45	380.24	39.02	385.03	40.34	508.59	41.27		y	0	10	20	40	80	160	μg/mL
			Stalk	752.03	49.34	761.34	45.65	758.93	62.34	769.68	63.32	832.34	54.34
			Leaf	1125.65	63.23	1109.32	74.98	1152.45	92.32	1294.23	63.43	1439.23	58.43

## Sheet: Chlorophy Ⅱ and photosynthesis
		Chlorophyll content
		content	error
	N1	1.08	0.34
	N2	1.31	0.28
	N3	1.29	0.25
	N4	1.24	0.23
	N5	1.03	0.15
	Rate of photosynthesis
		Rate of photosynthesis	error
	N1	1.75	0.53
	N2	1.89	0.34
	N3	2.12	0.38
	N4	2.14	0.29
	N5	1.68	0.24

## Sheet: Nitrate reductase 
			N1	Error	N2	Error	N3	Error	N4	Error	N5	Error			x	0.053	0.128	0.236	0.304	0.644	1.259
		Root	108.95	5.31	129.86	7.11	144.35	4.17	169.44	8.33	178.63	6.01			x	0.044	0.134	0.243	0.291	0.655	1.251
		Stalk	66.93	9.54	65.03	5.87	71.11	7.47	76.59	7.32	88.34	7.54			x average	0.0485	0.131	0.2395	0.2975	0.6495	1.255
		Leaf	109.96	8.31	111.45	10.45	113.76	9.33	188.45	7.43	233.43	10.14			y	0	6.25	12.5	25	50	100	pg/mL

## Sheet: Nitrite reductase activity 
															ng/ml	OD
			N1	Error	N2	Error	N3	Error	N4	Error	N5	Error			0	0
		Root	45.09	6.43	46.34	4.85	63.54	4.32	60.13	5.32	78.65	5.39			0.05	0.034
		Stalk	65.54	5.76	62.84	7.43	93.84	7.43	98.34	5.49	94.54	9.54			0.1	0.086
		Leaf	133.56	11.43	138.43	7.54	141.39	5.8	157.54	10.54	194.38	9.54			0.2	0.142
															0.4	0.284
															0.8	0.673

## Sheet: Glutamine synthetase activity
	N1	Error	N2	Error	N3	Error	N4	Error	N5	Error		x	0.055	0.117	0.207	0.322	0.672	1.37
Root	10.45	1.57	10.43	1.15	12.94	1.25	17.05	1.14	16.65	1.24		x	0.051	0.112	0.216	0.325	0.664	1.349
Stalk	15.54	1.09	20.05	0.85	20.96	0.59	23.85	0.94	22.41	1.66		x average	0.053	0.1145	0.2115	0.3235	0.668	1.3595
Leaf	21.45	1.13	20.97	1.43	21.87	1.27	25.04	1.23	28.43	1.98		y	0	20	40	80	160	320	pg/mL

## Sheet: Glutamate synthase activity
			N1	Error	N2	Error	N3	Error	N4	Error	N5	Error
		Root	166.45	12.45	178.34	12.34	202.45	11.45	198.34	14.65	201.45	15.67
		Stalk	237.64	12.43	269.54	13.54	393.16	14.24	386.34	17.65	351.43	15.76
		Leaf	453.45	21.45	465.34	16.76	458.95	24.42	600.33	25.54	698.45	21.43				x average	0.024	0.0976	0.1895	0.3034	0.624	1.275
																y	0	20	40	80	160	320	pg/mL

## Sheet: Glutamate dehydrogenase
		N1	Error	N2	Error	N3	Error	N4	Error	N5	Error
	Root	676.45	16.84	561.03	18.45	476.76	20.45	498.37	37.85	431.43	95.43		x	0.023	0.136	0.193	0.275	0.513	1.123
	Stalk	945.42	33.56	938.42	41.45	765.87	35.54	784.35	35.34	601.42	27.45		y	0	10	20	40	80	160	pg/mL
	Leaf	2131.34	23.95	1994.52	175.22	2045.53	67.56	1435.52	34.45	1327.95	35.65

## Sheet: Phenylalanine ammonia-lyase
		N1	Error	N2	Error	N3	Error	N4	Error	N5	Error
	Root	17.58	1.43	17.09	1.21	18.96	1.18	10.45	1.87	9.56	0.91		x	0.035	0.13	0.179	0.341	0.647	1.396
	Stalk	22.34	1.21	21.98	1.87	24.06	1.73	16.32	1.04	17.39	1.24		x	0.028	0.118	0.184	0.345	0.604	1.417
	Leaf	39.75	3.04	37.58	3.55	38.12	3.34	25.26	2.38	18.84	2.34		x average	0.0315	0.124	0.1815	0.343	0.6255	1.4065
													y	0	50	100	200	400	800	pg/mL

## Sheet: cinnamate 4-hydroxylase
		N1	Error	N2	Error	N3	Error	N4	Error	N5	Error
	Root	15.43	2.14	17.84	3.01	24.34	3.21	27.47	3.24	24.45	2.45	x	0.013	0.123	0.183	0.265	0.556	1.231
	Stalk	19.43	1.76	24.52	2.01	22.46	1.75	29.45	2.21	30.54	2.34	y	0	25	50	100	200	400	pg/mL
	Leaf	50.34	4.02	52.53	2.21	49.65	5.21	41.05	2.87	32.45	2.77

[truncated: 16 more sheets: 4-coumarate  coenzyme A ligase, Chalcone-thioase , Flavanone 3-hydroxylase, Flavonol synthase, sucrose, Glucose, Fructose, starch, Sucrose phosphosynthase, Sucrose synthetase, Neutral invertase , Soluble acid invertase , Glucose-6-phosphate dehydrogena, 6- Glucose phosphate dehydrogen, Flavonoids , Carton and Nitrogen content]
